# Supplementary material for: Sex and gender differences in healthcare utilisation trajectories: a cohort study among Quebec workers living with chronic pain
Source: PubMed Central journal article supplement — BMJ Open. 2023 Jul 28;13(7):e070509. doi: 10.1136/bmjopen-2022-070509 (PMC10387645; doi:10.1136/bmjopen-2022-070509), 2023-07-28
Supplement: bmjopen-2022-070509.reviewer_comments.pdf [file bmjopen-2022-070509.reviewer_comments.pdf]

## PEER REVIEW HISTORY

BMJ Open publishes all reviews undertaken for accepted manuscripts. Reviewers are asked to complete a checklist review form (<http://bmjopen.bmj.com/site/about/resources/checklist.pdf>) and are provided with free text boxes to elaborate on their assessment. These free text comments are reproduced below.

### ARTICLE DETAILS

|                            |                                                                                                                                                                                                    |
|----------------------------|----------------------------------------------------------------------------------------------------------------------------------------------------------------------------------------------------|
| <b>TITLE (PROVISIONAL)</b> | Sex and gender differences in health care utilization trajectories: A cohort study among Quebec workers living with chronic pain                                                                   |
| <b>AUTHORS</b>             | Lacasse, Anaïs; Nguena Nguéfack, Hermine Lore; Page, G; Choinière, Manon; Samb, Oumar; Katz, Joel; Ménard, Nancy; Vissandjée, Bilkis; Zerriouh, Meriem; on behalf of the TorSaDE Cohort Working, . |

### VERSION 1 – REVIEW

|                        |                                         |
|------------------------|-----------------------------------------|
| <b>REVIEWER</b>        | Gazerani, Parisa<br>Aalborg Universitet |
| <b>REVIEW RETURNED</b> | 02-Dec-2022                             |

|                         |                                                                                                                                                                                                                                                                                                                                                                                                                                                                                                                                                                                                                                                                                                                                                                                                                                                                                                                                                                                                                                                                                                                                                                                                                                                                                                                                                |
|-------------------------|------------------------------------------------------------------------------------------------------------------------------------------------------------------------------------------------------------------------------------------------------------------------------------------------------------------------------------------------------------------------------------------------------------------------------------------------------------------------------------------------------------------------------------------------------------------------------------------------------------------------------------------------------------------------------------------------------------------------------------------------------------------------------------------------------------------------------------------------------------------------------------------------------------------------------------------------------------------------------------------------------------------------------------------------------------------------------------------------------------------------------------------------------------------------------------------------------------------------------------------------------------------------------------------------------------------------------------------------|
| <b>GENERAL COMMENTS</b> | <ul style="list-style-type: none"> <li>• Did the authors identify a discrepancy in the definition of sex versus gender in their data set? What do the authors suggest for registries considering gender fluidity that is now accepted in society but less implemented in health care systems, and what will be the influence of this point in the retrospective data obtained from already existing databases and registries? do the authors have a suggestion or recommendation?</li> <li>• How the findings presented in this study can be implemented at 3 levels for patients, clinicians, for policymakers, please elaborate.</li> <li>• Did the authors identify any change in gender in the longitudinal dataset? it seems that from adolescence to adulthood some cases might change gender from one to another or back later in adulthood. How such changes can be accommodated in the analysis?</li> <li>• Can healthcare utilization be defined in a more detailed way in future studies? Any alternative way or addition to health care visits for example?</li> <li>• Please elaborate and comment on the internal versus external validity of this study. Can the findings be generalized for an expanded conclusion?</li> <li>• Please add the sources of bias in this study and the attempts made to minimize those</li> </ul> |
|-------------------------|------------------------------------------------------------------------------------------------------------------------------------------------------------------------------------------------------------------------------------------------------------------------------------------------------------------------------------------------------------------------------------------------------------------------------------------------------------------------------------------------------------------------------------------------------------------------------------------------------------------------------------------------------------------------------------------------------------------------------------------------------------------------------------------------------------------------------------------------------------------------------------------------------------------------------------------------------------------------------------------------------------------------------------------------------------------------------------------------------------------------------------------------------------------------------------------------------------------------------------------------------------------------------------------------------------------------------------------------|

|                        |                                                                                             |
|------------------------|---------------------------------------------------------------------------------------------|
| <b>REVIEWER</b>        | de Meij, Nelleke<br>Maastricht University Medical Centre+, Anesthesiology and Pain Medicine |
| <b>REVIEW RETURNED</b> | 29-Jan-2023                                                                                 |

|                         |                                                                                                                                                                                                                         |
|-------------------------|-------------------------------------------------------------------------------------------------------------------------------------------------------------------------------------------------------------------------|
| <b>GENERAL COMMENTS</b> | This is a nice written manuscript, with important sex en gender information in the CP population. I have no comments on the manuscript, except maybe that tl underline the need for furhter research on sex and gender. |
|-------------------------|-------------------------------------------------------------------------------------------------------------------------------------------------------------------------------------------------------------------------|

VERSION 1 – AUTHOR RESPONSE

Reply to Reviewer 1 - Dr. Parisa Gazerani, Aalborg Universitet

| Comments and suggestions                                                                                   | Reply and page numbers in the “Track changes” version of the manuscript                                                                                                                                                                                                                                                                                                                                                                                                                                                                                                                                                                                                                                                           |
|------------------------------------------------------------------------------------------------------------|-----------------------------------------------------------------------------------------------------------------------------------------------------------------------------------------------------------------------------------------------------------------------------------------------------------------------------------------------------------------------------------------------------------------------------------------------------------------------------------------------------------------------------------------------------------------------------------------------------------------------------------------------------------------------------------------------------------------------------------|
| <p>1. Did the authors identify a discrepancy in the definition of sex versus gender in their data set?</p> | <p>We would like to thank the reviewer for the valuable and constructive comments.</p> <p>As published in our paper about the GENDER Index development (<a href="#">Lacasse, Pagé, et al., 2020</a>), sex and GENDER Index scores appeared related but partly independent in the TorSaDE Cohort (e.g., incomplete histogram overlap, variability of gender scores within each sex group):</p> 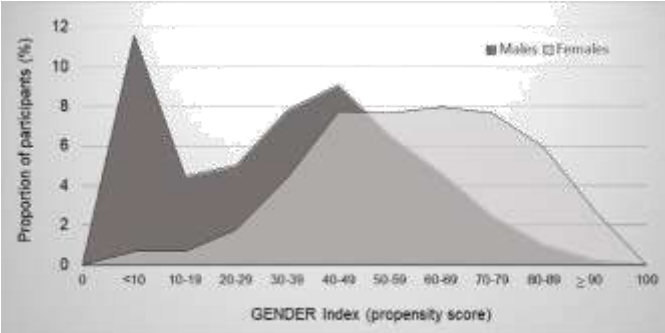 <p><i>Fig. 1 Distribution of GENDER Index scores in males and females.</i></p> <p><i>Higher scores on the 0–100 GENDER Index can be interpreted as a</i></p> <p><i>higher level of characteristics associated with being female/having</i></p> |

*more feminine characteristics.*

This precision about our index was added to our methodology (**p. 9**).

What do the authors suggest for registries considering gender fluidity that is now accepted in society but less implemented in health care systems, and what will be the influence of this point in the retrospective data obtained from already existing databases and registries? do the authors have a suggestion or recommendation?

We would suggest all federal and provincial survey and patient registry developers to plan the measurement of sex at birth, gender identity (which was not available in our data), in addition to gender-related variables (e.g., responsibility for caring for children, occupation, number of hours of work). The inclusion of such measures would allow for more relevant, equitable, diversified, and inclusive future research. This is now underlined in our manuscript (**p. 17**).

---

2. How the findings presented in this study can be implemented at 3 levels for patients, clinicians, for policymakers, please elaborate.

Implications for knowledge users are now covered all together in the discussion (**p. 17-18**). Our discussion now reads as follows:

**Implications for Knowledge Users**

***For clinicians.*** It will be important for clinicians to be aware

of their clientele who are heavy healthcare users. Be vigilant

about the presence of sex disparities vs. inequities is relevant.

Disparities are not undesirable as such, unless they result in

unfairness and injustice. On the other side, inequities are undesirable and should be subject to moral criticism as they imply unfairness and injustice [(76, 77)]. One may wonder, for example, if males receive similar medical follow-up and prescription opportunities as females do to manage their pain.

Our results provide valuable information to identify, early on, patients who are more likely to experience heavy health care utilization—i.e., females—and adapt health care services accordingly (e.g., assess if heavy health care use is useful and necessary). **For patients.** It will be important to raise awareness among persons living with chronic pain, especially women, regarding the trends found in this study.

Partnership with patients and the public could help explore the causes and potential solutions. **For policymakers.** We would suggest all federal and provincial survey and patient registry developers to plan the measurement of sex at birth, gender identity (which was not available in our data), in addition to gender-related variables (e.g., responsibility for caring for children, occupation, number of hours of work). The inclusion of such measures would allow for more relevant, equitable, diversified, and inclusive future research. **For researchers.**

Our results underline the importance of considering both sex

|                                                                                                                        |                                                                                                                                                                                                                                                                                                                                                                                                                                                                                                                                                                                                                                                                                                                                                                                                                                                                                                                                                                                                                                                                                                                                                                                                                                               |
|------------------------------------------------------------------------------------------------------------------------|-----------------------------------------------------------------------------------------------------------------------------------------------------------------------------------------------------------------------------------------------------------------------------------------------------------------------------------------------------------------------------------------------------------------------------------------------------------------------------------------------------------------------------------------------------------------------------------------------------------------------------------------------------------------------------------------------------------------------------------------------------------------------------------------------------------------------------------------------------------------------------------------------------------------------------------------------------------------------------------------------------------------------------------------------------------------------------------------------------------------------------------------------------------------------------------------------------------------------------------------------|
|                                                                                                                        | <p>and gender in CP healthcare utilization research. This approach allows for a better understanding of whether differences are explained by biological factors or indirect measurement of social factors, and consequently helps identify modifiable risk factors for unfavourable outcomes.</p> <p>Although the non-pain-related medical literature abounds with findings demonstrating the tendency of females to have more health service contacts (74), our study is novel as it represents a first step in demystifying distinct subgroups of health care users among females and males living with CP.</p> <p>Future studies should build upon our work and enhance and diversify the operationalization of healthcare utilization and care trajectories. For example, they could focus on a specific type of visits (e.g., emergency department visits), examine transitions between different care sectors (primary, secondary, tertiary), or analyze sequences of care events over time (e.g., sequence analysis (59)). Further studies should also examine the reasons for sex differences (e.g., qualitative studies allowing an in-depth understanding of the behaviours and experiences specific to people living with CP).</p> |
| <p>3. Did the authors identify any change in gender in the longitudinal dataset? it seems that from adolescence to</p> | <p>This is a valid point. However, in our study, gender was assessed using the GENDER Index, which was computed using cross-sectional survey variables</p>                                                                                                                                                                                                                                                                                                                                                                                                                                                                                                                                                                                                                                                                                                                                                                                                                                                                                                                                                                                                                                                                                    |

adulthood some cases might change gender from one to another or back later in adulthood. How such changes can be accommodated in the analysis?

(Canadian Community Health Survey-CCHS). Although some Canadians may have participated multiple times in the CCHS, our sample was limited to only one CCHS participation (Figure 1), and we cannot accommodate such changes in the analysis. We have now highlighted this limitation in the manuscript (**p. 20**). The cross-sectional nature of the CCHS is also better underlined now (**p. 9 and 19**). We will keep this good idea for

|                                                                                                                                                                                                                                                           |                                                                                                                                                                                                                                                                                                                                                                                                                                                                                                                                                                                                                                                                                                                                                             |
|-----------------------------------------------------------------------------------------------------------------------------------------------------------------------------------------------------------------------------------------------------------|-------------------------------------------------------------------------------------------------------------------------------------------------------------------------------------------------------------------------------------------------------------------------------------------------------------------------------------------------------------------------------------------------------------------------------------------------------------------------------------------------------------------------------------------------------------------------------------------------------------------------------------------------------------------------------------------------------------------------------------------------------------|
|                                                                                                                                                                                                                                                           | <p>another study that could be conducted exclusively among individuals who have participated in the ESCC more than once.</p>                                                                                                                                                                                                                                                                                                                                                                                                                                                                                                                                                                                                                                |
| <p>4. Can healthcare utilization be defined in a more detailed way in future studies? Any alternative way or addition to health care visits for example?</p>                                                                                              | <p>The reviewer is absolutely right. Our study applied trajectory analysis for the first time to investigate the association between sex, gender, and healthcare trajectories among persons living with chronic pain. Future studies should build upon our work and enhance and diversify the operationalization of healthcare utilization and care trajectories. For example, they could focus on a specific type of visits (e.g., emergency department visits), examine transitions between different care sectors (primary, secondary, tertiary), or analyze sequences of care events over time (e.g., sequence analysis (<a href="#">Nguena Nguetack et al., 2020</a>)). This is now underlined in the discussion of the manuscript (<b>p. 18</b>).</p> |
| <p>5. Please elaborate and comment on the internal versus external validity of this study. Can the findings be generalized for an expanded conclusion?</p> <p>6. Please add the sources of bias in this study and the attempts made to minimize those</p> | <p>The <i>Strengths and limitations</i> section of our manuscript provided a description of the potential biases of our study as well as its external validity.</p> <p>To enhance the clarity of this section, we have reformulated the information and added various clarifications that enable the reader to identify the specific type of bias or validity being discussed (<b>p. 18-20</b>). It now reads as follows:</p> <p><i>“Selection bias and external validity. The TorSaDE Cohort, a unique database harnessing the strengths of longitudinal</i></p>                                                                                                                                                                                           |

claim data from Canadian universal health care coverage

linked to cross-sectional patient-reported outcomes, allowed

to increase the generalizability of our results to various

persons living with CP in Canada and possibly in countries

with a similar gender norms and health care system. In fact,

probability sampling and diversity of profiles are strengths of

the CCHS. Also, CCHS allowed to work with a community

sample and include people with little or no contact with the

health care system, as compared to studies using

administrative databases alone, using medical charts, or

involving clinic-based recruitment). A limitation is, however,

that the GENDER Index was available only to workers

([Lacasse, Pagé, et al., 2020](#)) limiting our capacity to study

older adults who are more likely to have CP. Still, various

socioeconomic and health impairment profiles (e.g.,

participants reporting severe pain) could be taken into

account in the multivariable analysis.

*Information bias.* Available data did not allow us to apply the

new accepted definition of CP (persistent or recurrent pain

lasting over three months ([Treede et al., 2019](#))). However,

our CCHS-based CP definition has been used in many



epidemiology studies ([Gilmour, 2015](#); [Hogan et al., 2016](#),  
[2017](#); [Ramage-Morin, 2008](#); [Ramage-Morin &](#)

[Gilmour, 2010](#); [Reitsma et al., 2012](#); [Reitsma et al., 2011](#)) [and](#) provides prevalence estimates comparable to studies using more traditional definitions ([Moore et al., 2014](#)). In our study, the index date (defined as CCHS date of completion) was not related to a significant event in the care trajectory of CP patients (e.g., first diagnosis). Consequently, trajectories modelled in this study represent a random picture of a part of the life course of participants, and patterns of health care utilization were quite stable over time. A limitation of our study is also that we had to study all-cause health care visits (as medical claims do not allow reliable identification of CP-related health care contacts/visits) ([Lacasse, Cauvier Charest, et al., 2020](#); [Lacasse et al., 2015](#)). Nevertheless, this allows the patient journey to be viewed as a whole, which could also be seen as a strength.

Next relevant aspect, gender was assessed using the GENDER Index, which was computed using cross-sectional CCHS variables. Although some Canadians may have participated multiple times in the CCHS, our sample was limited to only one CCHS participation (Figure 1), and we could not accommodate change in gender over time in the analysis. Overall, the strengths of using the TorSaDe Cohort clearly outweigh the disadvantages since, to our knowledge at the time of this study, no pain-specific Canadian data

|  |                                                                                                                                                                                                                                                                                                                                                                                                                                                                                                                                                                                                        |
|--|--------------------------------------------------------------------------------------------------------------------------------------------------------------------------------------------------------------------------------------------------------------------------------------------------------------------------------------------------------------------------------------------------------------------------------------------------------------------------------------------------------------------------------------------------------------------------------------------------------|
|  | <p>source outside tertiary care settings links self-reported data</p> <p>from thousands of patients to longitudinal administrative databases (the only way to study bio-psychosocial determinants of health care trajectories).</p> <p><i>Confounding.</i> The use of multivariable analysis in a large sample of participants and the availability of many potential confounders chosen according to recognized models (<a href="#">Andersen, 1995</a>; <a href="#">Babitsch et al., 2012</a>; <a href="#">Bauer, 2021</a>; <a href="#">Mena et al., 2019</a>) allowed us to control confounding.</p> |
|--|--------------------------------------------------------------------------------------------------------------------------------------------------------------------------------------------------------------------------------------------------------------------------------------------------------------------------------------------------------------------------------------------------------------------------------------------------------------------------------------------------------------------------------------------------------------------------------------------------------|

**Reply to Reviewer 2 - Dr. Nelleke de Meij, Maastricht University Medical Centre**

| Comments and suggestions                                                                                                                                                                                                           | Reply and page numbers in the “Track changes” version of the manuscript                                                                                                                                                                                                                                                                                                                                                                                                                                                                      |
|------------------------------------------------------------------------------------------------------------------------------------------------------------------------------------------------------------------------------------|----------------------------------------------------------------------------------------------------------------------------------------------------------------------------------------------------------------------------------------------------------------------------------------------------------------------------------------------------------------------------------------------------------------------------------------------------------------------------------------------------------------------------------------------|
| <p>1. This is a nice written manuscript, with important sex and gender information in the CP population. I have no comments on the manuscript, except maybe that to underline the need for further research on sex and gender.</p> | <p>We truly appreciate the positive comment provided about our manuscript and thank the reviewer for the helpful recommendation.</p> <p>The need for further research that takes into account both sex and gender have been reinforced in the discussion of our manuscript (p. 18):</p> <p><i>“Our results underline the importance of considering both sex and gender in CP healthcare utilization research. This approach allows for a better understanding of whether differences are explained by biological factors or indirect</i></p> |

*measurement of social factors, and consequently helps*

*identify modifiable risk factors for unfavourable outcomes.”*

## References

- Andersen, R. M. (1995). Revisiting the behavioral model and access to medical care: does it matter? *J Health Soc Behav*, 36(1), 1-10. <https://www.ncbi.nlm.nih.gov/pubmed/7738325>
- Babitsch, B., Gohl, D., & von Lengerke, T. (2012). Re-revisiting Andersen's Behavioral Model of Health Services Use: a systematic review of studies from 1998-2011. *Psychosoc Med*, 9, Doc11. <https://doi.org/10.3205/psm000089>
- Bauer, G. (2021). *Meet the Methods Series: Quantitative intersectional study design and primary data collection, Issue 3 Part 1*. <https://cihr-irsc.gc.ca/e/52352.html>
- Gilmour, H. (2015). Chronic pain, activity restriction and flourishing mental health. *Health Rep*, 26(1), 15-22. <https://www.ncbi.nlm.nih.gov/pubmed/25606984>
- Hogan, M. E., Taddio, A., Katz, J., Shah, V., & Krahn, M. (2016). Incremental health care costs for chronic pain in Ontario, Canada: a population-based matched cohort study of adolescents and adults using administrative data. *Pain*, 157(8), 1626-1633. <https://doi.org/10.1097/j.pain.0000000000000561>
- Hogan, M. E., Taddio, A., Katz, J., Shah, V., & Krahn, M. (2017). Health utilities in people with chronic pain using a population-level survey and linked health care administrative data. *Pain*, 158(3), 408-416. <https://doi.org/10.1097/j.pain.0000000000000776>
- Lacasse, A., Cauvier Charest, E., Dault, R., Cloutier, A.-M., Choinière, M., Blais, L., Vanasse, A., & on behalf of the TORSADE Cohort Working Group. (2020). Validity of Algorithms for Identification of Individuals Suffering from Chronic Noncancer Pain in Administrative Databases: A Systematic Review. *Pain Medicine*, 21(9), 1825-1839. <https://doi.org/10.1093/pm/pnaa004>
- Lacasse, A., Pagé, M. G., Choinière, M., Dorais, M., Vissandjée, B., Nguéfacq, H. L. N., Katz, J., Samb, O. M., & Vanasse, A. (2020). Conducting gender-based analysis of existing databases when self-reported gender data are unavailable: the GENDER Index in a working population. *Can J Public Health*, 111(2), 155-168. <https://doi.org/10.17269/s41997-019-00277-2>
- Lacasse, A., Ware, M. A., Dorais, M., Lanctot, H., & Choiniere, M. (2015). Is the Quebec provincial administrative database a valid source for research on chronic non-cancer pain? *Pharmacoepidemiol Drug Saf*, 24(9), 980-990. <https://doi.org/10.1002/pds.3820>
- Mena, E., Bolte, G., Bolte, G., Mena, E., Rommel, A., Saß, A.-C., Pöge, K., Strasser, S.,

Holmberg, C., Merz, S., Jaehn, P., & on behalf of the, A. G. S. G. (2019). Intersectionality-based quantitative health research and sex/gender sensitivity: a scoping review. *Int J Equity Health*, 18(1), 199. <https://doi.org/10.1186/s12939-019-1098-8>

Moore, R. A., Derry, S., Taylor, R. S., Straube, S., & Phillips, C. J. (2014). The costs and consequences of adequately managed chronic non-cancer pain and chronic neuropathic pain. *Pain Pract*, 14(1), 79-94. <https://doi.org/10.1111/papr.12050>

Nguena Nguetack, H. L., Pagé, M. G., Katz, J., Choinière, M., Vanasse, A., Dorais, M., Samb, O. M., & Lacasse, A. (2020). Trajectory Modelling Techniques Useful to Epidemiological Research: A Comparative Narrative Review of Approaches. *Clin Epidemiol*, 12, 1205-1222. <https://doi.org/10.2147/clep.S265287>

Ramage-Morin, P. L. (2008). Chronic pain in Canadian seniors. *Health Rep*, 19(1), 37-52. <https://www.ncbi.nlm.nih.gov/pubmed/18457210>

Ramage-Morin, P. L., & Gilmour, H. (2010). Chronic pain at ages 12 to 44. *Health Rep*, 21(4), 53-61. <http://www.ncbi.nlm.nih.gov/pubmed/21269012>

Reitsma, M., Tranmer, J. E., Buchanan, D. M., & VanDenKerkhof, E. G. (2012). The epidemiology of chronic pain in Canadian men and women between 1994 and 2007: longitudinal results of the National Population Health Survey. *Pain Res Manag*, 17(3), 166-172. <http://www.ncbi.nlm.nih.gov/pubmed/22606681>

Reitsma, M. L., Tranmer, J. E., Buchanan, D. M., & Vandenberg, E. G. (2011). The prevalence of chronic pain and pain-related interference in the Canadian population from 1994 to 2008. *Chronic Dis Inj Can*, 31(4), 157-164. <https://www.ncbi.nlm.nih.gov/pubmed/21978639>

Treede, R. D., Rief, W., Barke, A., Aziz, Q., Bennett, M. I., Benoliel, R., Cohen, M., Evers, S., Finnerup, N. B., First, M. B., Giambardino, M. A., Kaasa, S., Korwisi, B., Kosek, E., Lavand'homme, P., Nicholas, M., Perrot, S., Scholz, J., Schug, S., . . . Wang, S. J. (2019). Chronic pain as a symptom or a disease: the IASP Classification of Chronic Pain for the International Classification of Diseases (ICD-11) [Review]. *Pain*, 160(1), 19-27. <https://doi.org/10.1097/j.pain.0000000000001384>

#### VERSION 2 – REVIEW

|                         |                                                                                      |
|-------------------------|--------------------------------------------------------------------------------------|
| <b>REVIEWER</b>         | Gazerani, Parisa<br>Aalborg Universitet                                              |
| <b>REVIEW RETURNED</b>  | 06-Jul-2023                                                                          |
| <b>GENERAL COMMENTS</b> | The authors have addressed the points raised and accordingly revised the manuscript. |
